# Supplementary material for: Assessing mortality registration in Kerala: the MARANAM study
Source: PubMed Central journal article supplement (PMC8744029; doi:10.1186/s41118-021-00149-z), 2022-01-10
Supplement: 41118_2021_149_MOESM1_ESM.pdf [file 41118_2021_149_MOESM1_ESM.pdf]

# SUPPLEMENTARY APPENDIX

## Migration and mortality estimates

Kerala is a high-migration context. In 2011, the Kerala Migration Survey estimated that 2.28 million emigrants from Kerala lived across the world ([Rajan & Zachariah, 2019](#)).<sup>1</sup> It is not clear the extent to which the deaths of migrants from Kerala are missed by the Civil Registration System (CRS) and the degree to which these deaths bias mortality estimates reported here. These deaths should be included if the people dying were usual residents of Kerala. Similarly, the population estimates in the denominator of our mortality calculations are also for usual residents of Kerala.<sup>2</sup>

### International migration

Based on data we have access to, we do not know the exact number of people who died outside India but were usual residents of Kerala to include them in our mortality estimates. The closest estimate available is the overall death counts provided by Indian embassies for 2009 to 2016. In 2009, 1,222 deaths were registered at all Indian consulates and missions abroad. This number was 1,652 deaths in 2010, 1,745 deaths in 2011, 1,754 deaths in 2012, 1,106 deaths in 2013, 4,161 deaths in 2014, 4,160 deaths in 2015, and 4,266 deaths in 2016. These total deaths are a small fraction of overall deaths in the CRS. Indeed, the highest number of deaths was in 2016, and these deaths are just 1.7 percent of the total deaths registered in that year. Although it would be useful to understand mortality patterns among migrants from Kerala, it is likely that additional information on these deaths will not alter the estimated mortality rates and life expectancy values.

### Internal migration

Kerala is ranked above other Indian states in its performance on migrant-friendly policies and attracts migrant labor from other parts of India ([Bhagat & Keshri, 2020](#)). In 2011, the Indian census counted about 683,828 individuals who were living in Kerala but were born outside the state ([Office of the Registrar General and Census Commissioner of India, 2011](#)). The census also counted 654,423 individuals whose last residence was outside Kerala but within another state of India. Of these, about 80,045 individuals' last place of residence was outside the state of Kerala in the last year. In Appendix Table [A9](#), we examine changes in the crude death rate for Kerala if these individuals are removed from the denominator. We also examine the extent to which the crude death rate changes if we exclude those deaths for persons whose state of permanent residence was not Kerala according to the CRS. In general, Appendix Table [A9](#) shows that excluding those with permanent residence reported to be outside Kerala, people born outside Kerala, or people whose last residence was outside Kerala in the last year does not change the estimated crude death rate substantially. It is worth noting that some of the people excluded here may in fact be usual residents. If true estimates of usual residents among those who are alive or dead are available, changes in the crude death rates will likely be smaller than the ones reported here.

## References

- Bhagat, R. B., & Keshri, K. (2020). Internal migration in India. In *Internal migration in the countries of asia* (pp. 207–228). Springer. [http://dx.doi.org/10.1007/978-3-030-44010-7\\_11](http://dx.doi.org/10.1007/978-3-030-44010-7_11)
- DHS Program. (2020). *Spatial Data Repository - Population Estimates*. Retrieved 2020-12-25, from <https://spatialdata.dhsprogram.com/population-estimates/>
- Office of the Registrar General and Census Commissioner of India. (2011). *Census of India 2011: Household listing Operations. Office of the Registrar General Census Commissioner, India. Indian Census Bureau.*
- Rajan, S. I., & Zachariah, K. C. (2019). *Emigration and remittances: New evidences from the Kerala migration survey 2018* (Tech. Rep.).

**Figure A1** Ratio of mortality rates from the civil and sample registration systems

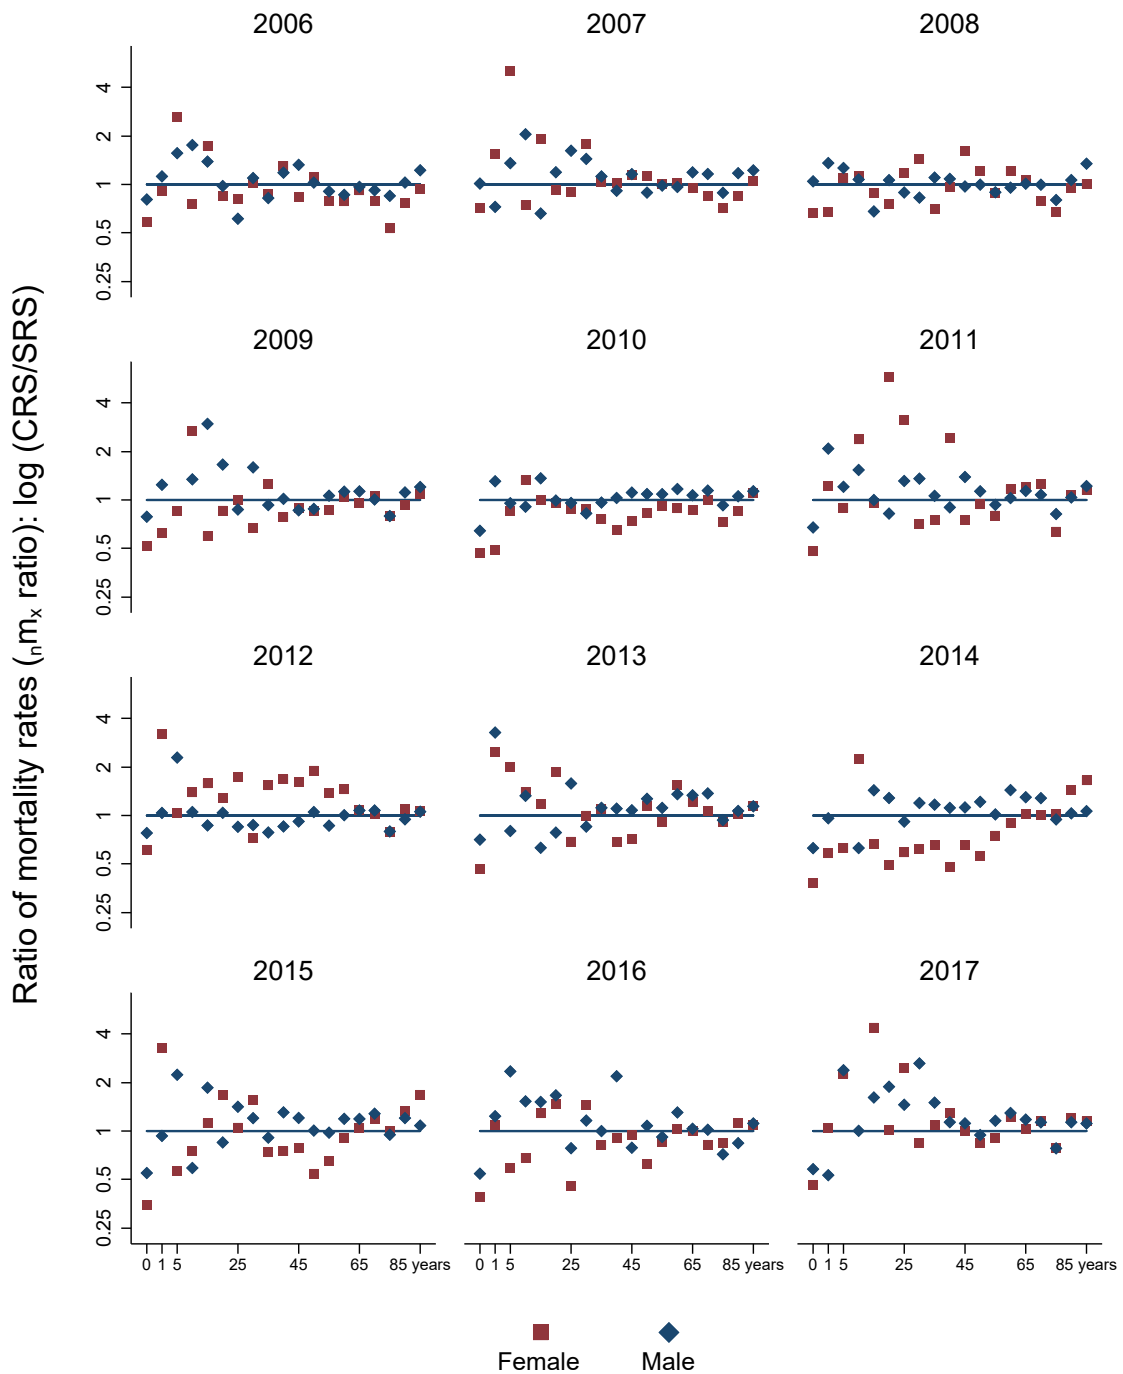

Sample Registration System (SRS) estimates are from SRS annual reports. Civil Registration System (CRS) estimates are calculated from observed CRS deaths and estimated mid-year population.

**Figure A2** Comparison of estimates of  ${}_1m_0$

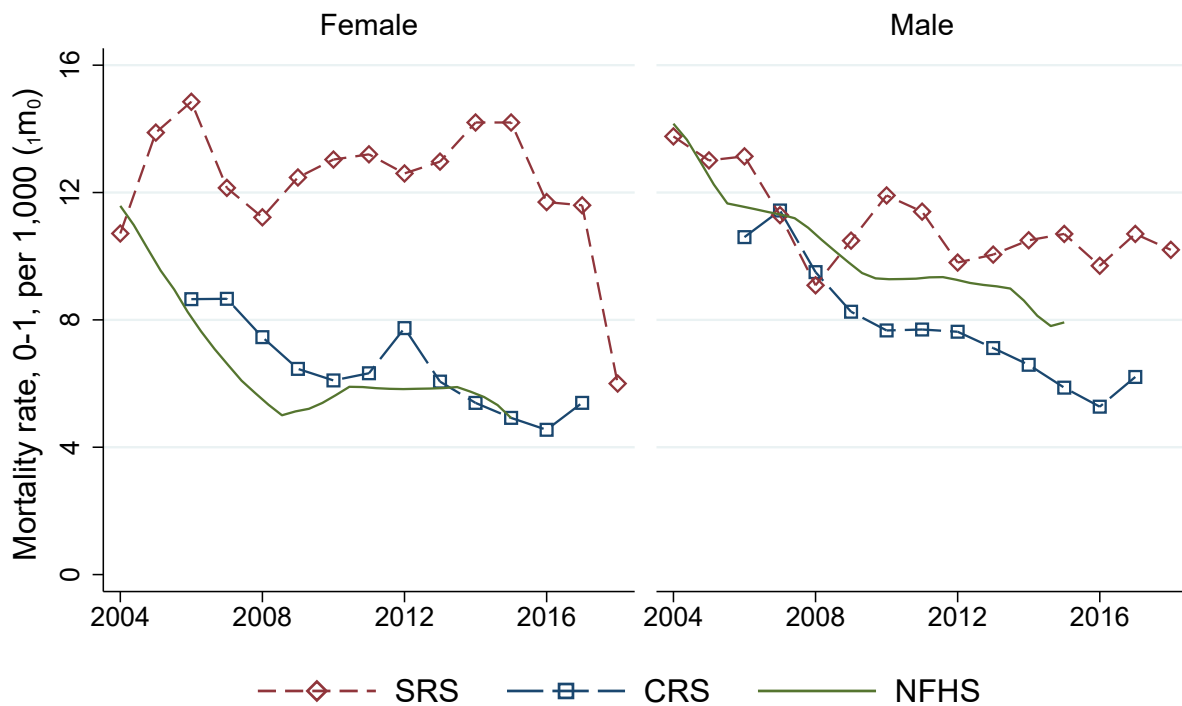

National Family Health Survey (NFHS) estimates are smoothed and reflect two-year moving averages. NFHS estimates are calculated by estimating person years lived and deaths in each year. Sample Registration System (SRS) estimates are from SRS annual reports. Civil Registration System (CRS) estimates are calculated from observed CRS deaths and estimated mid-year population.

**Figure A3 Comparison of sex ratios of  ${}_1m_0$  (boys v girls)**

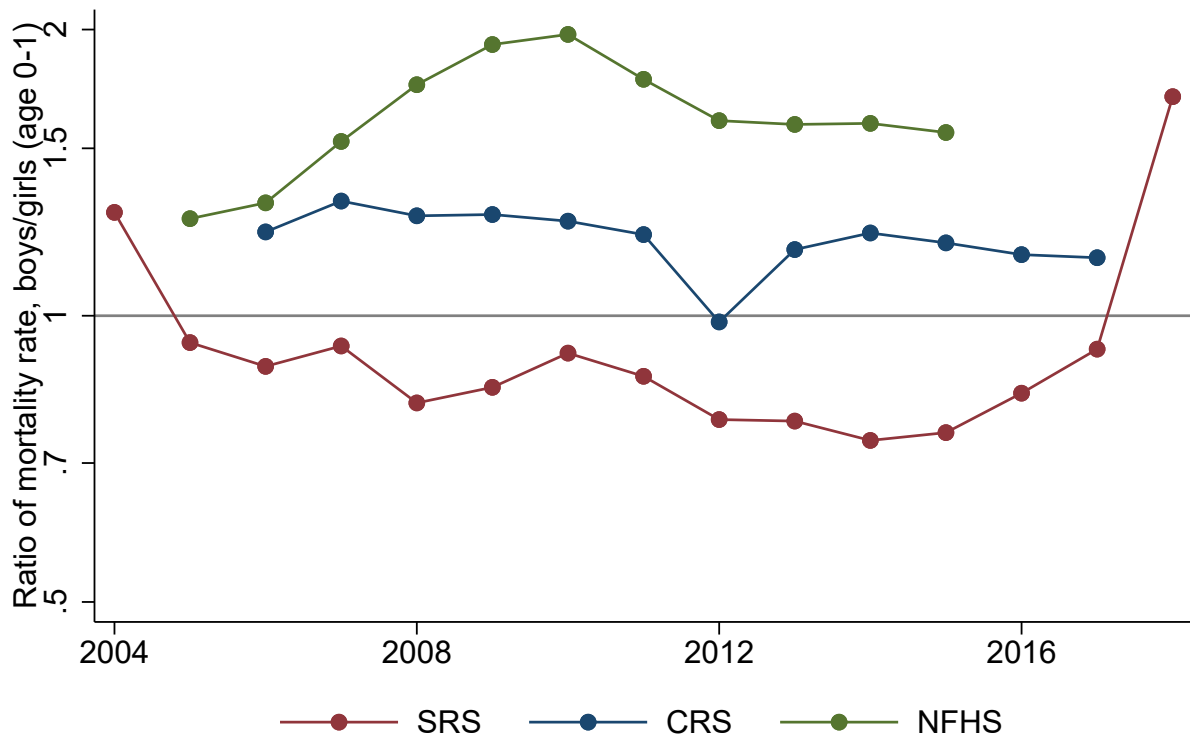

Ratio shown is mortality rate for boys divided by mortality rate for girls in ages 0-1. National Family Health Survey (NFHS) estimates are smoothed and reflect two-year moving averages. NFHS estimates are calculated by estimating person years lived and deaths in each year. Sample Registration System (SRS) estimates are from SRS annual reports. Civil Registration System (CRS) estimates are calculated from observed CRSdeaths and estimated mid-year population.

**Figure A4** Comparison of estimates of infant mortality rate from civil and sample registration systems

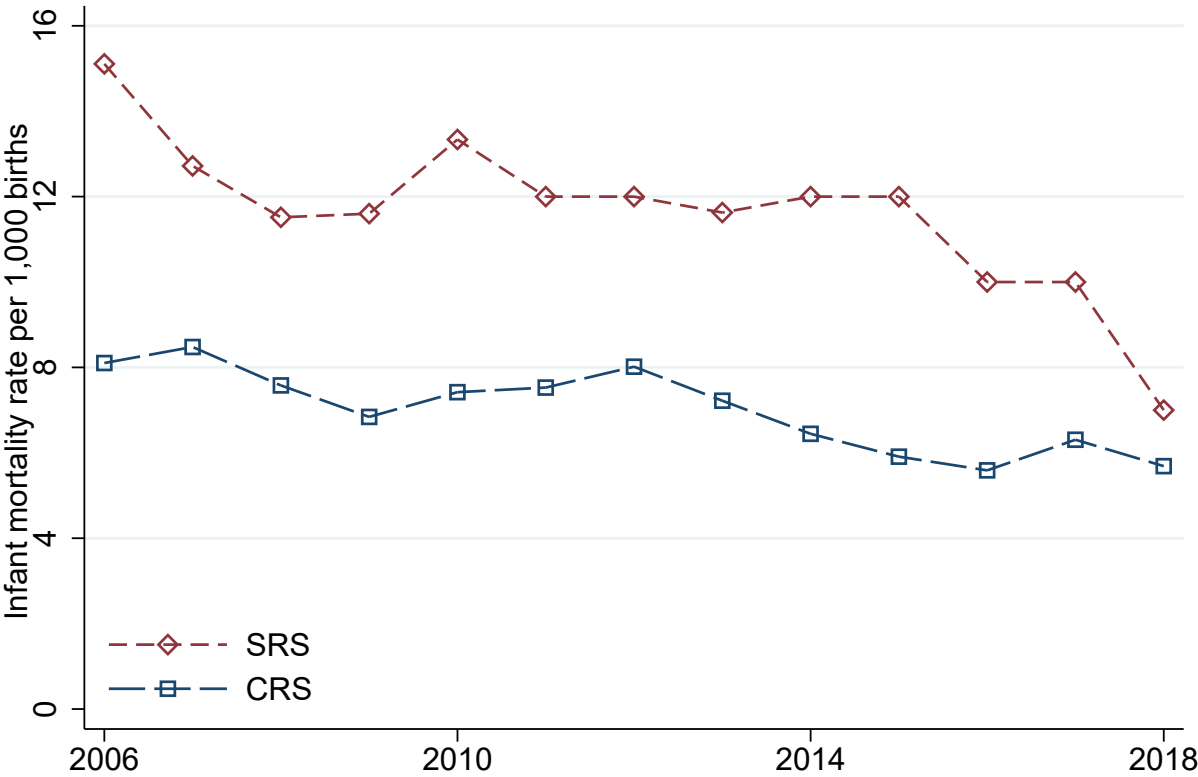

Civil Registration System (CRS) estimates are calculated by dividing infant deaths by births in a year. Sample Registration System (SRS) rates are from annual summary reports prepared by the SRS.

**Figure A5** Comparison of three-year average estimates of  ${}_n m_x$  from civil and sample registration systems

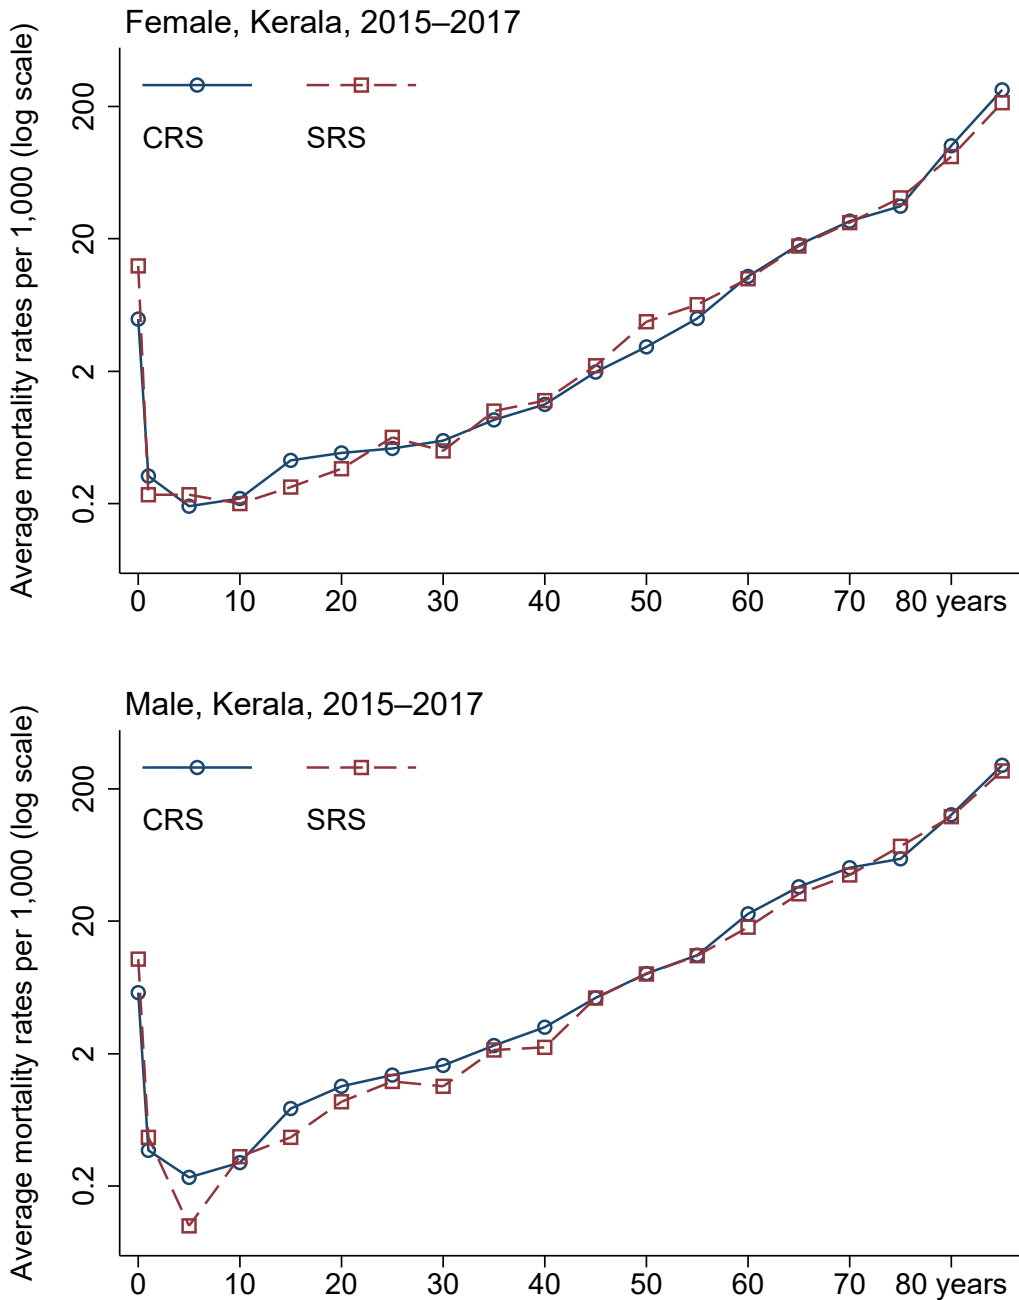

Sample Registration System (SRS) mortality rates are three-year averages from SRS statistical reports for 2015–2017. Civil Registration System (CRS) mortality rates are the three year average rates for 2015–2017.

**Figure A6** Comparison of five-year average estimates of  ${}_n m_x$  from civil and sample registration systems

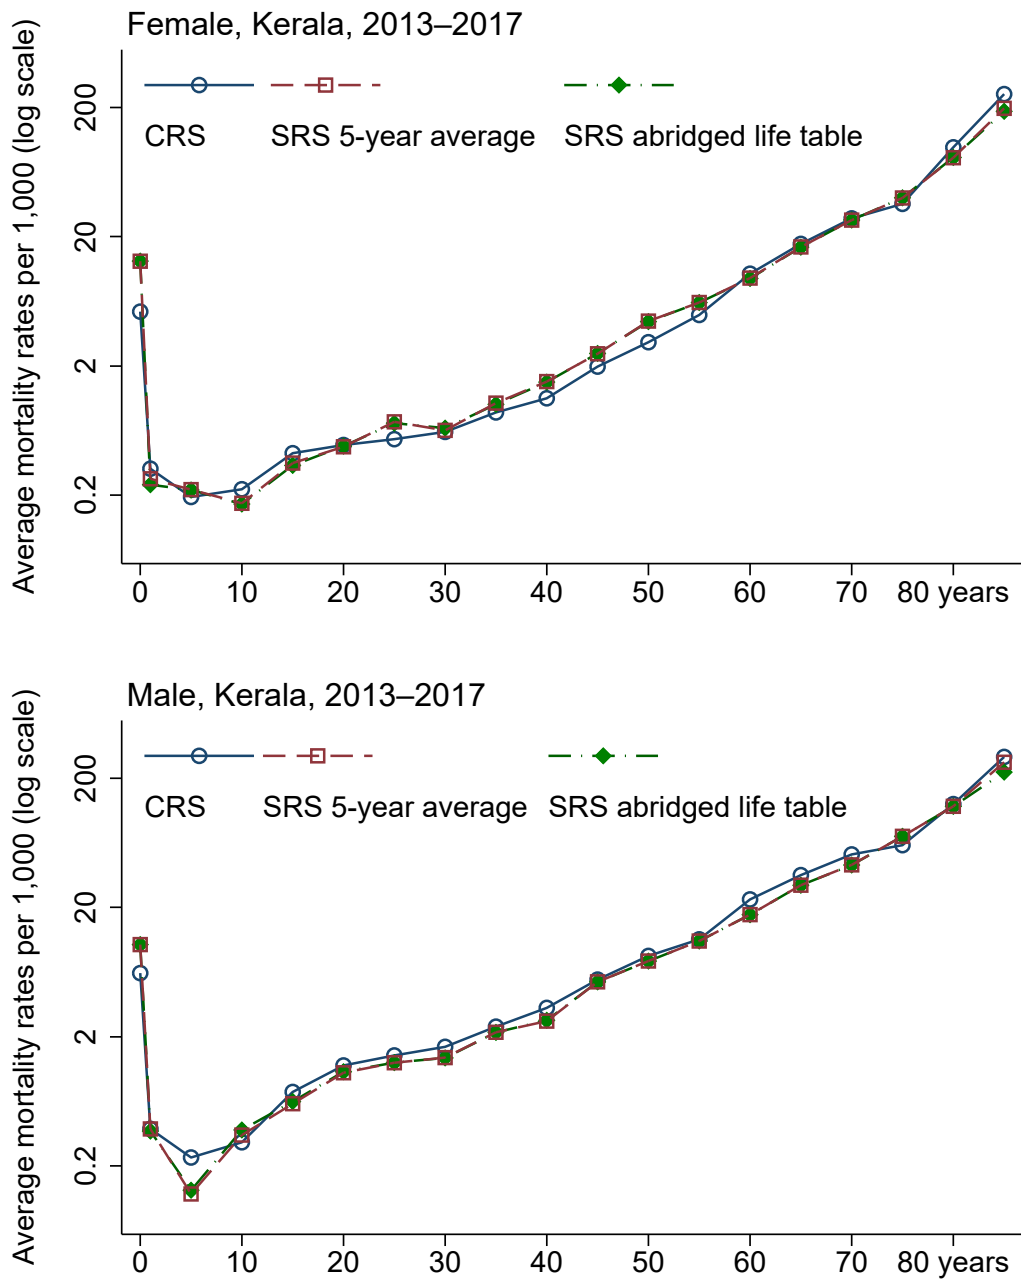

Sample Registration System (SRS) mortality rates are the five-year average rates calculated using annual SRS statistical reports for 2013–2017. Civil registration System (CRS) mortality rates are for the five-year period 2013–2017 and use population estimates calculated by the DHS Program (2020). The SRS abridged life table mortality rates are for 2013–2017.



**Figure A7** Census vs estimated exposures (2011, mid year)

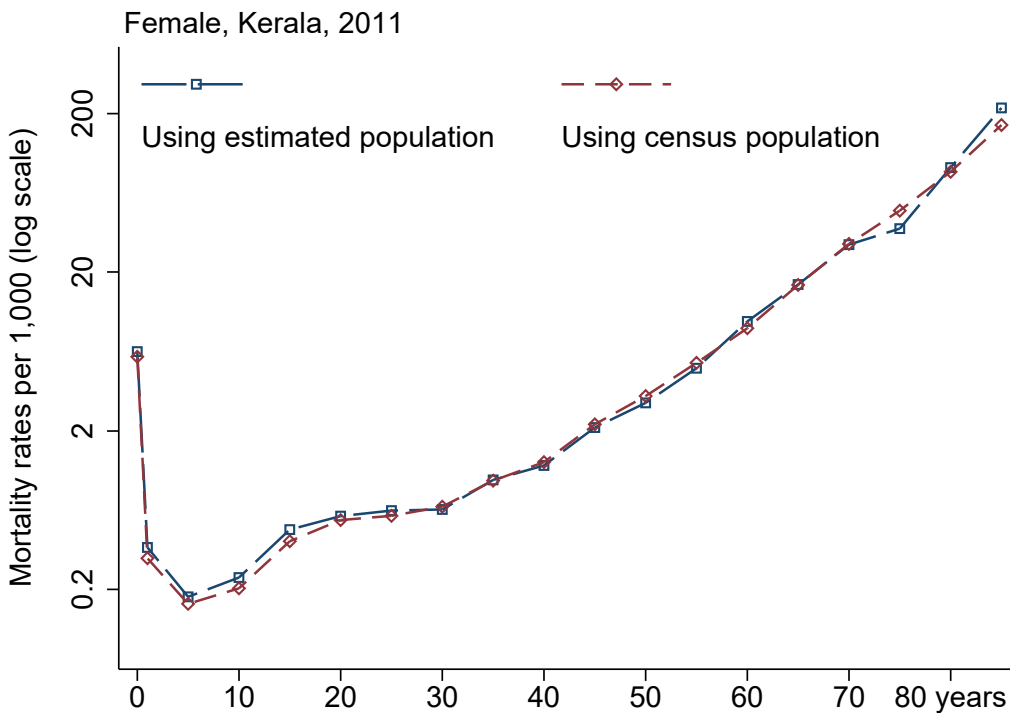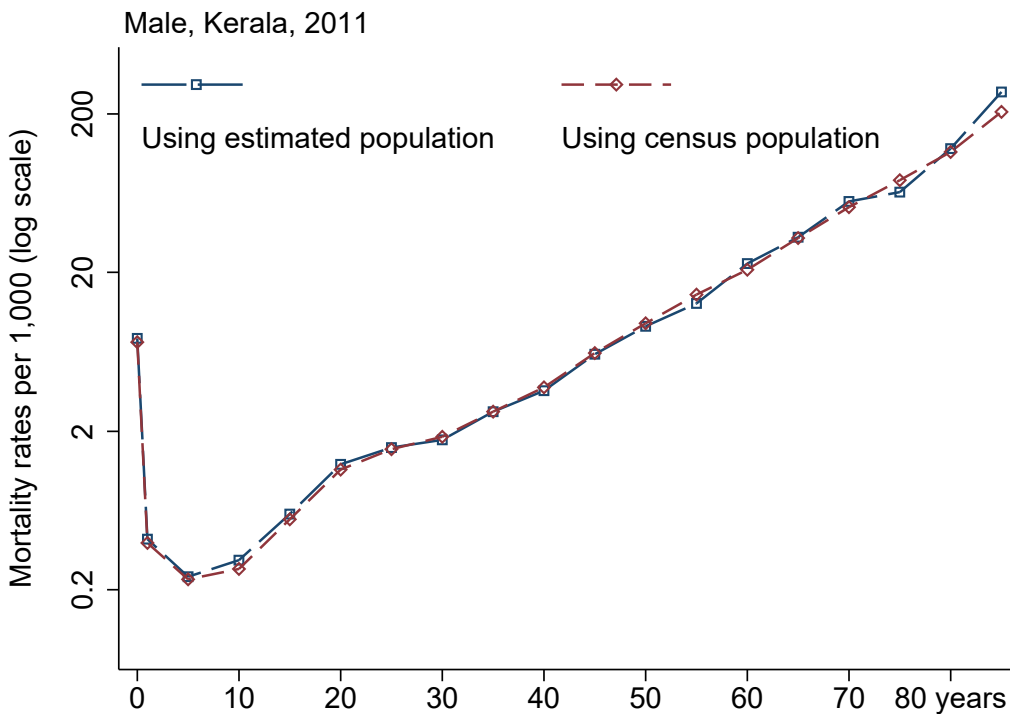

Estimated population rates are calculated by dividing deaths for the calendar year by the population estimated by the DHS Program (2020). Census population rates are calculated by dividing deaths from September 1, 2010 to August 31, 2011 by the 2011 census population.

**Figure A8** Official projections vs estimated exposures (2016)

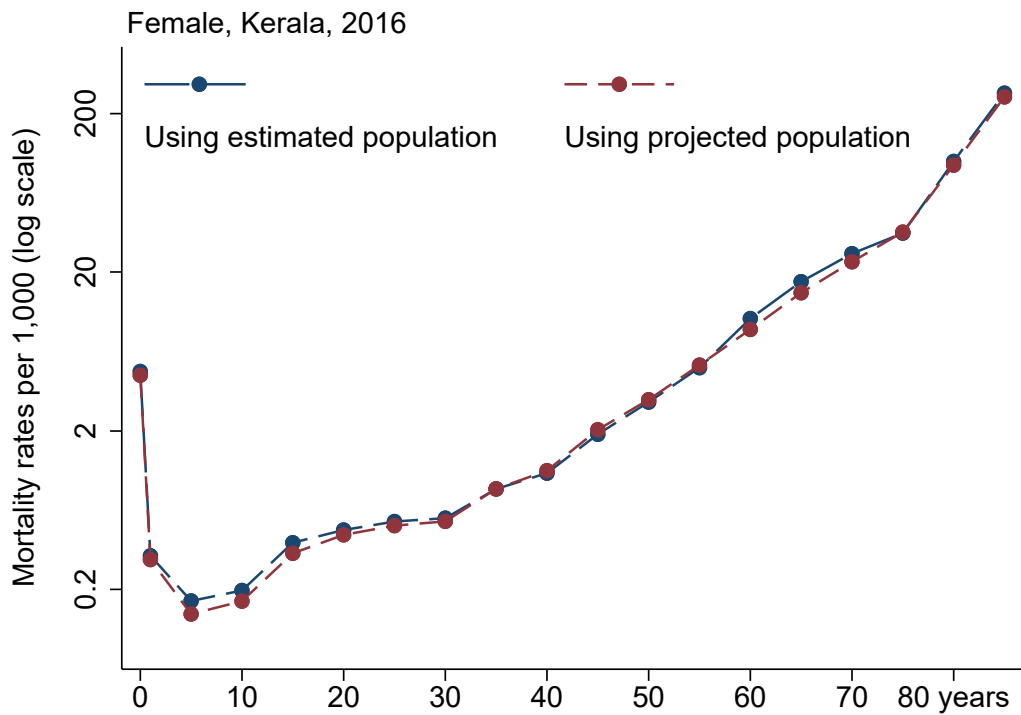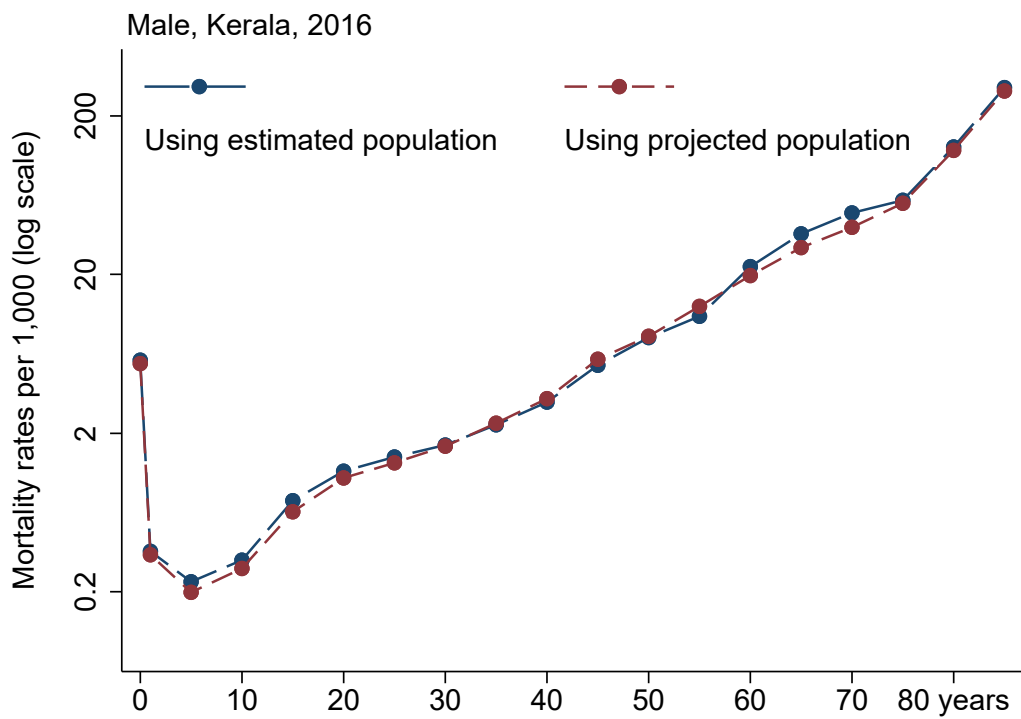

Estimated population rates are calculated by dividing deaths for the calendar year by the population estimated by the DHS Program (2020). Census population rates are calculated by dividing deaths for the calendar year by the projected census population for 2016.

**Figure A9** Age distribution of deaths, female, 2006–2017

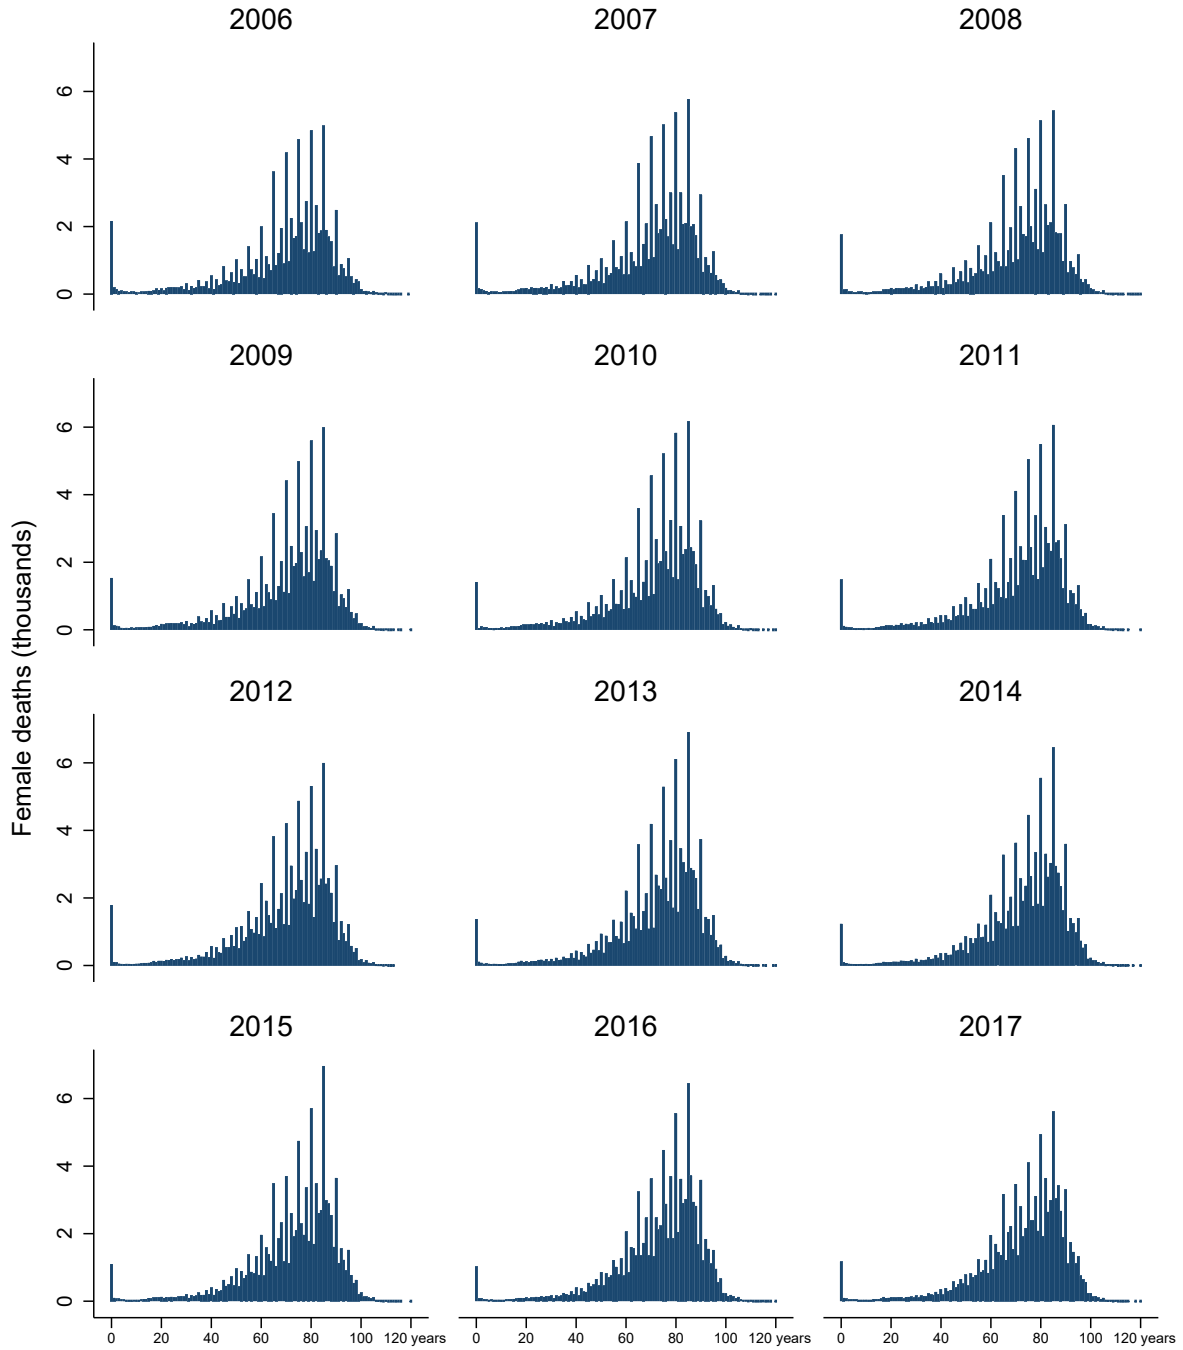

Individual-level death records from the Department of Economics and Statistics and the Department of Local Self-Government, Government of Kerala

Figure A10 Age distribution of deaths, male, 2006–2017

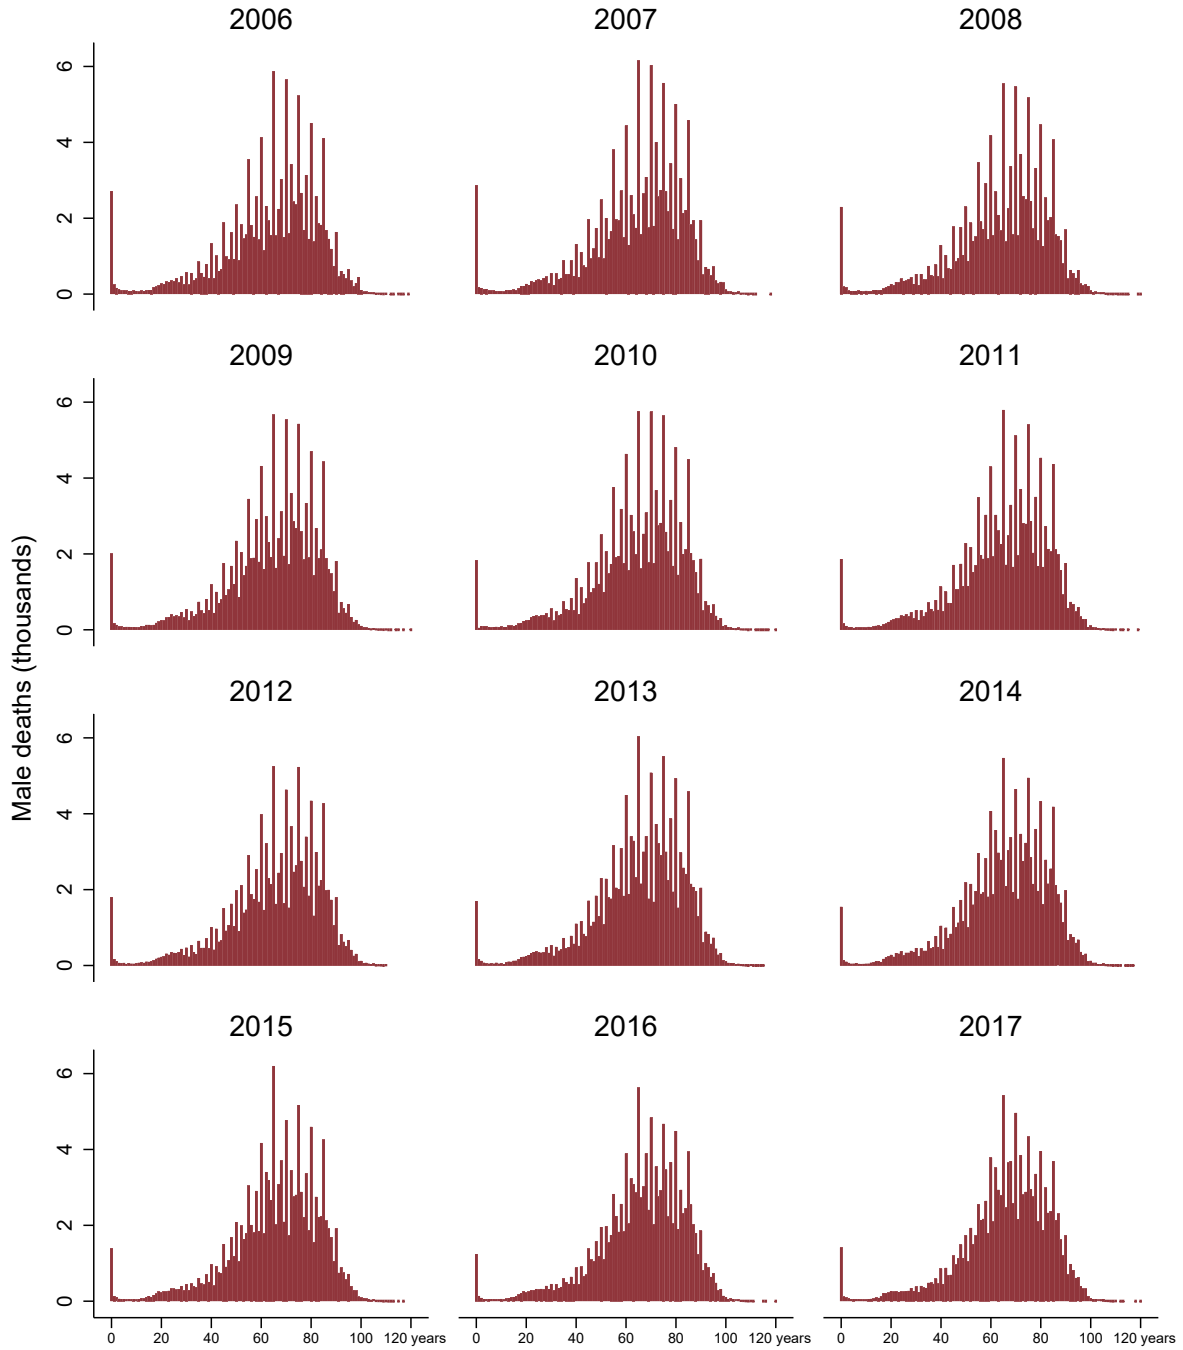

Individual-level death records from the Department of Economics and Statistics and the Department of Local Self-Government, Government of Kerala

**Figure A11** Age heaping: Myers blended index and Whipple index

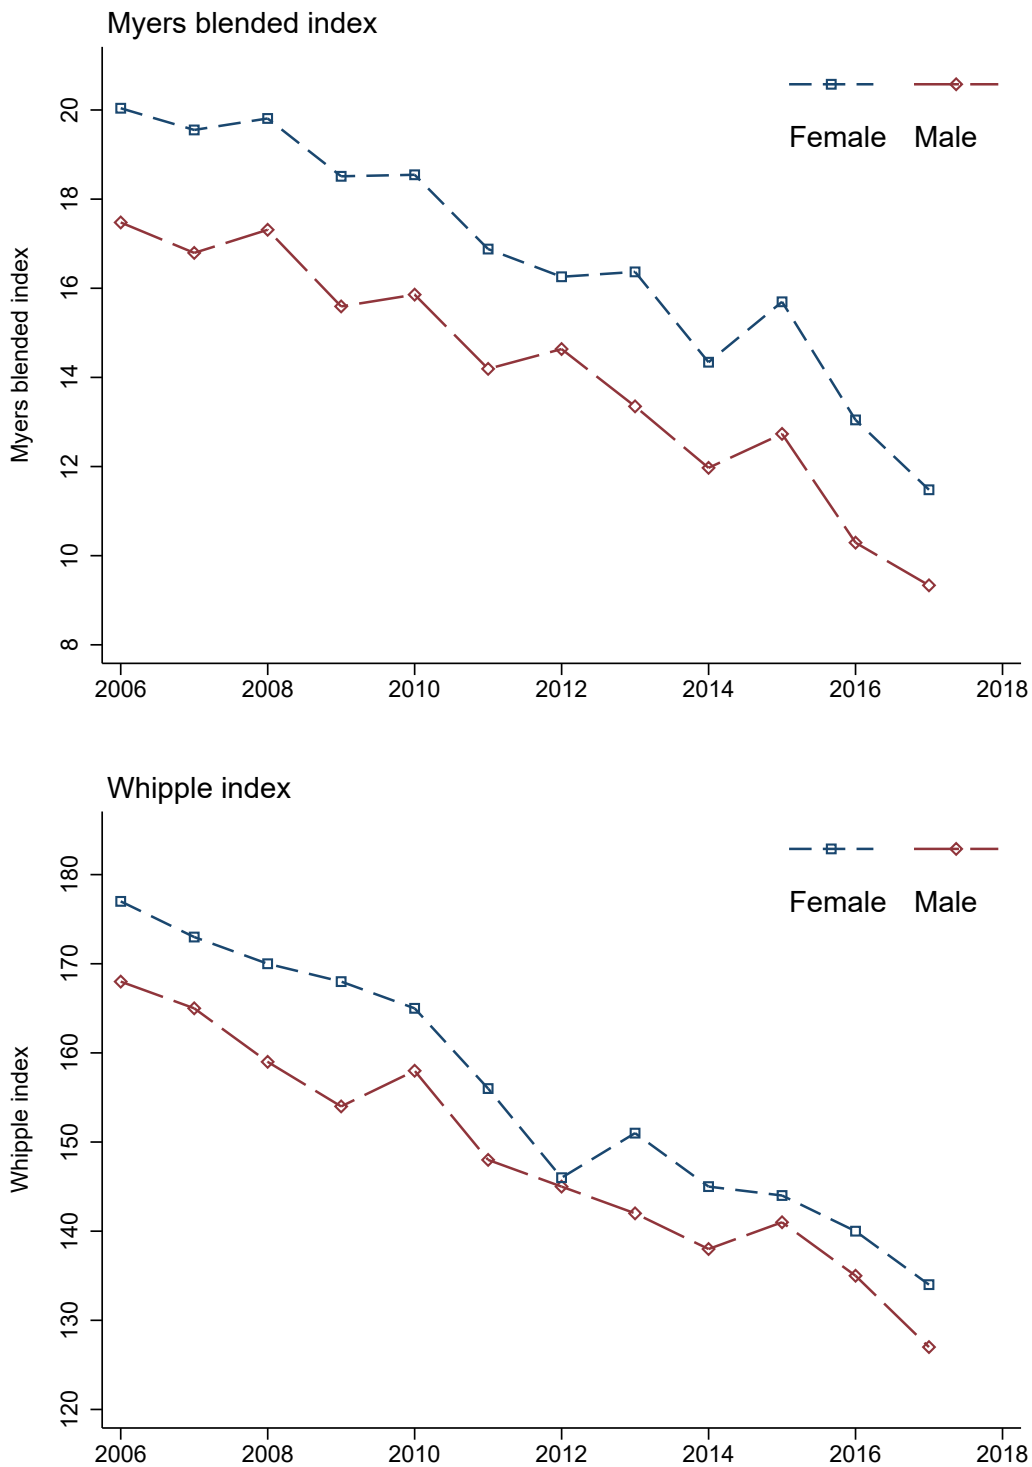

The Myers index considers preference of ages ending in each of the digits 0 to 9. The index ranges from 0 to 90. 0 indicates no age heaping and 90 indicates extreme age heaping. Whipple's index indicates the preference of ages ending in 0 or 5 for ages between 23 and 62. The index ranges from 100 to 500, with 100 representing no digit preference.

**Figure A12** Comparison of unadjusted and Gompertz life-table estimates, single age years, 2010–2011

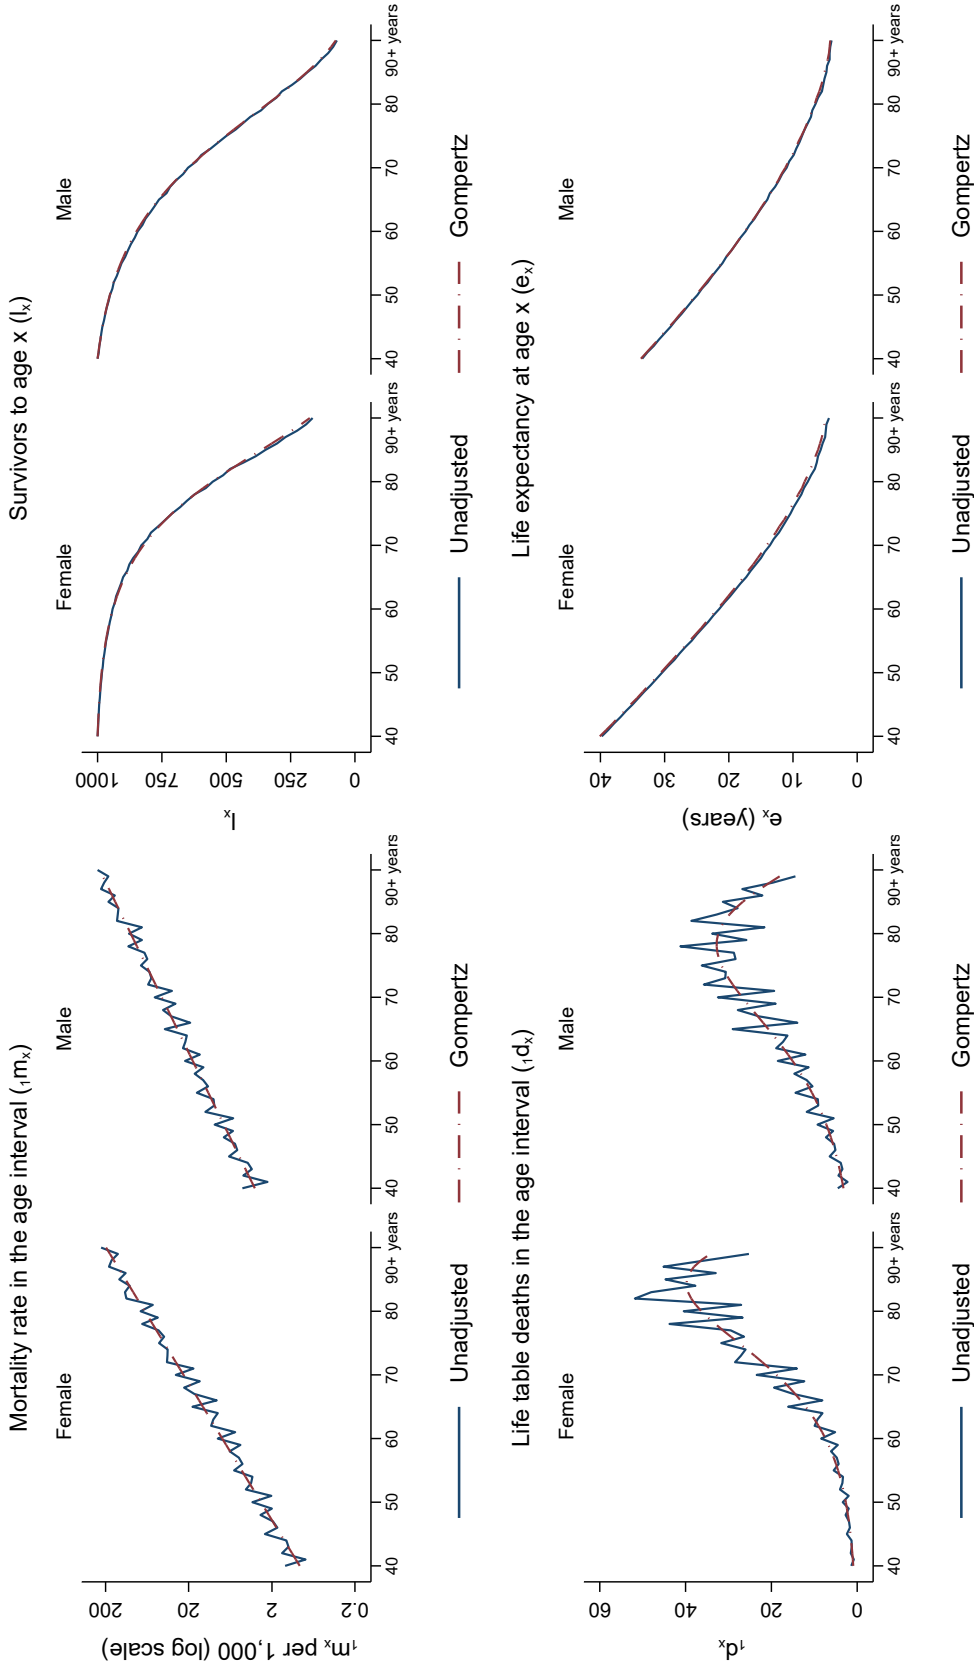

Note: Radix in the  $l_x$  graphs starts at age 40. The open-ended age interval is age 90. Age groups in x axis are in single age years. Unadjusted rates use Census 2011 as exposures and deaths in the period 1 September 2010 to 31 August 2011. Gompertz mortality rates are predicted age-specific mortality rates using the unadjusted mortality rates in single ages. Both sets of life tables assume an  ${}_n a_x$  of 0.5.

**Figure A13** Comparison of the relationship between child and adult mortality in Kerala and Human Mortality Database countries

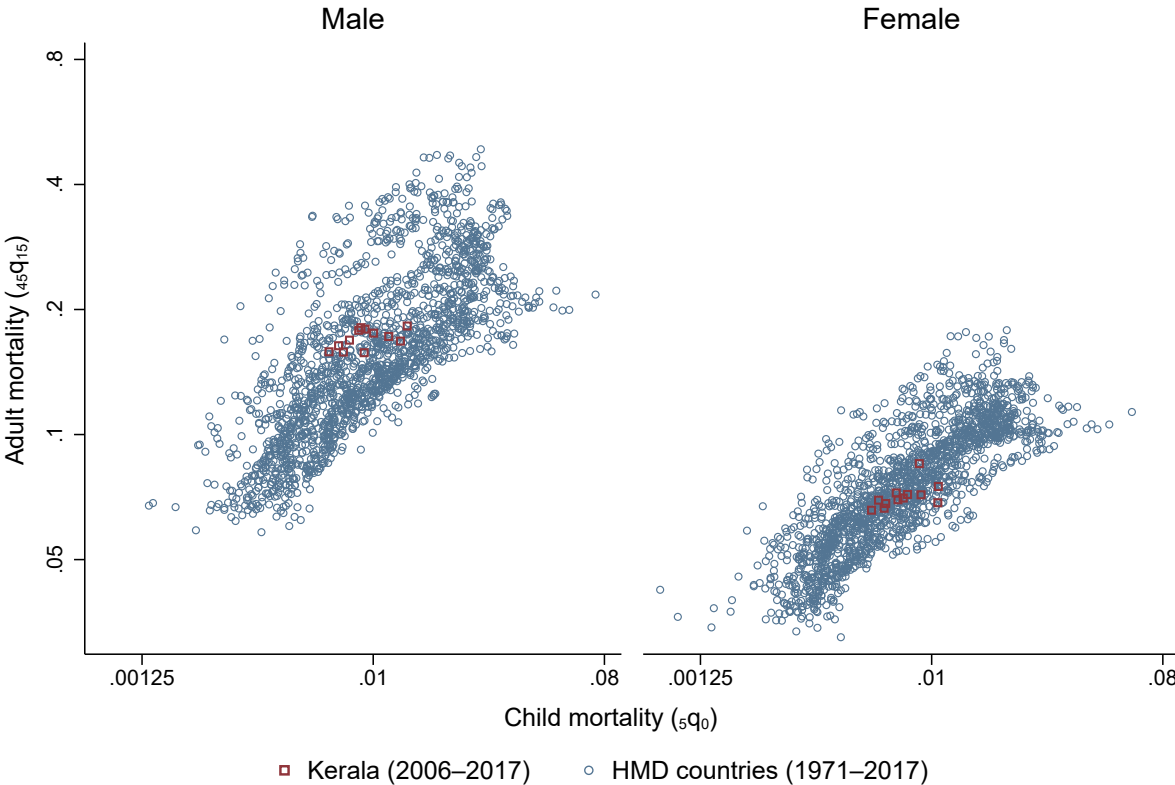

${}_nq_x$  estimated using CRS data for Kerala and Human Mortality Database (HMD) for HMD populations.

**Figure A14** Comparison of the relationship between child and old-age mortality in Kerala and Human Mortality Database countries

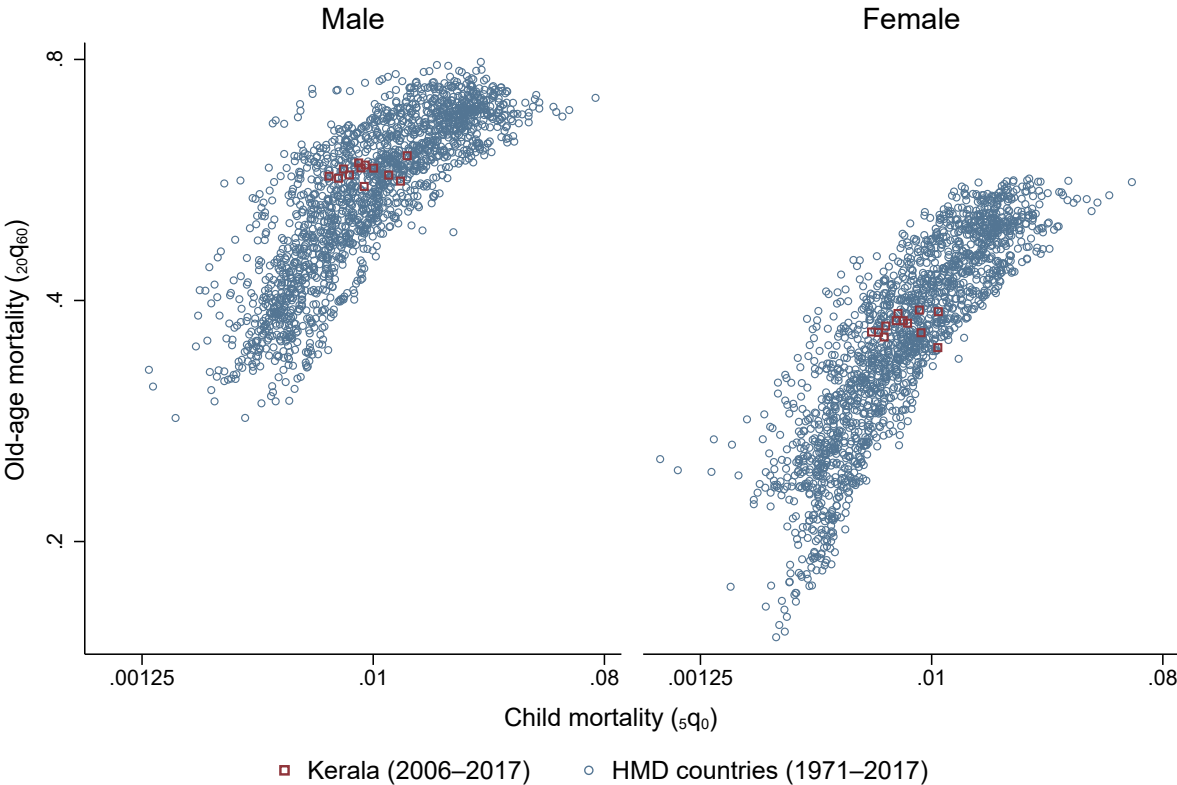

${}_nq_x$  estimated using CRS data for Kerala and Human Mortality Database (HMD) for HMD populations.



**Table A1** Observations with missing data, 2006–2017

| Year | Only age (%) |      |       | Only sex | Sex and age | Sex or age |
|------|--------------|------|-------|----------|-------------|------------|
|      | Female       | Male | Total | %        | %           | %          |
| 2006 | 0.03         | 0.02 | 0.02  | 1.97     | 0.00        | 1.99       |
| 2007 | 0.49         | 0.41 | 0.44  | 1.23     | 0.00        | 1.66       |
| 2008 | 0.53         | 0.52 | 0.52  | 0.61     | 0.00        | 1.13       |
| 2009 | 0.68         | 0.64 | 0.66  | 0.32     | 0.01        | 0.98       |
| 2010 | 0.86         | 0.84 | 0.85  | 0.06     | 0.02        | 0.91       |
| 2011 | 0.70         | 0.63 | 0.66  | 0.01     | 0.01        | 0.67       |
| 2012 | 0.57         | 0.52 | 0.54  | 0.01     | 0.00        | 0.55       |
| 2013 | 0.50         | 0.45 | 0.47  | 0.01     | 0.00        | 0.48       |
| 2014 | 0.45         | 0.39 | 0.41  | 0.01     | 0.00        | 0.42       |
| 2015 | 0.49         | 0.46 | 0.47  | 0.01     | 0.00        | 0.48       |
| 2016 | 0.49         | 0.44 | 0.46  | 0.00     | 0.00        | 0.46       |
| 2017 | 0.32         | 0.31 | 0.31  | 0.01     | 0.00        | 0.32       |

Note: Authors' calculations using data from the Kerala MARANAM Study and adjusted population estimates from the [DHS Program \(2020\)](#). Column 2 (3) refers to the share of female (male) deaths with missing age. Columns 4 to 7 refer to the share of total deaths with missing observations for the specified category.

**Table A2** Life tables, 2011

| Age x | Female |        |       |        |       | Male   |        |       |        |       |
|-------|--------|--------|-------|--------|-------|--------|--------|-------|--------|-------|
|       | $nm_x$ | $nq_x$ | $l_x$ | $nL_x$ | $e_x$ | $nm_x$ | $nq_x$ | $l_x$ | $nL_x$ | $e_x$ |
| 0     | 0.0063 | 0.0063 | 1000  | 994.3  | 78.2  | 0.0077 | 0.0076 | 1000  | 992.9  | 70.9  |
| 1     | 0.0004 | 0.0015 | 994   | 3971.2 | 77.7  | 0.0004 | 0.0017 | 992   | 3965.5 | 70.5  |
| 5     | 0.0002 | 0.0009 | 992   | 4959.0 | 73.8  | 0.0002 | 0.0012 | 991   | 4950.5 | 66.6  |
| 10    | 0.0002 | 0.0012 | 991   | 4953.9 | 68.9  | 0.0003 | 0.0015 | 990   | 4943.7 | 61.7  |
| 15    | 0.0005 | 0.0024 | 990   | 4945.5 | 64.0  | 0.0006 | 0.0030 | 988   | 4933.5 | 56.7  |
| 20    | 0.0006 | 0.0029 | 988   | 4932.1 | 59.1  | 0.0012 | 0.0062 | 985   | 4911.0 | 51.9  |
| 25    | 0.0006 | 0.0031 | 985   | 4917.6 | 54.3  | 0.0016 | 0.0078 | 979   | 4876.0 | 47.2  |
| 30    | 0.0006 | 0.0032 | 982   | 4901.9 | 49.4  | 0.0018 | 0.0088 | 971   | 4836.2 | 42.6  |
| 35    | 0.0010 | 0.0049 | 979   | 4882.2 | 44.6  | 0.0027 | 0.0132 | 963   | 4784.1 | 37.9  |
| 40    | 0.0012 | 0.0060 | 974   | 4856.3 | 39.8  | 0.0036 | 0.0178 | 950   | 4710.5 | 33.4  |
| 45    | 0.0021 | 0.0104 | 968   | 4816.8 | 35.0  | 0.0061 | 0.0301 | 933   | 4599.6 | 28.9  |
| 50    | 0.0030 | 0.0149 | 958   | 4756.5 | 30.4  | 0.0092 | 0.0449 | 905   | 4429.2 | 24.8  |
| 55    | 0.0050 | 0.0245 | 944   | 4665.5 | 25.8  | 0.0128 | 0.0621 | 864   | 4196.1 | 20.8  |
| 60    | 0.0098 | 0.0479 | 921   | 4501.7 | 21.4  | 0.0228 | 0.1082 | 811   | 3846.2 | 17.0  |
| 65    | 0.0167 | 0.0806 | 876   | 4220.4 | 17.3  | 0.0334 | 0.1549 | 723   | 3349.3 | 13.7  |
| 70    | 0.0299 | 0.1397 | 806   | 3766.8 | 13.6  | 0.0562 | 0.2477 | 611   | 2691.7 | 10.8  |
| 75    | 0.0377 | 0.1732 | 693   | 3182.4 | 10.3  | 0.0644 | 0.2776 | 460   | 1981.9 | 8.5   |
| 80    | 0.0915 | 0.3740 | 573   | 2341.8 | 7.0   | 0.1212 | 0.4625 | 332   | 1267.4 | 5.8   |
| 85    | 0.2178 | 1.0000 | 359   | 1647.5 | 4.6   | 0.2758 | 1.0000 | 178   | 647.2  | 3.6   |

Note: Authors' calculations using data from the Kerala MARANAM Study and adjusted population estimates from [DHS Program \(2020\)](#).

**Table A3** Life tables, 2012

| Age x | Female |        |       |        |       | Male   |        |       |        |       |
|-------|--------|--------|-------|--------|-------|--------|--------|-------|--------|-------|
|       | $nm_x$ | $nq_x$ | $l_x$ | $nL_x$ | $e_x$ | $nm_x$ | $nq_x$ | $l_x$ | $nL_x$ | $e_x$ |
| 0     | 0.0077 | 0.0077 | 1000  | 993.0  | 77.5  | 0.0076 | 0.0076 | 1000  | 993.0  | 72.3  |
| 1     | 0.0003 | 0.0013 | 992   | 3966.1 | 77.1  | 0.0004 | 0.0017 | 992   | 3965.8 | 71.8  |
| 5     | 0.0002 | 0.0010 | 991   | 4952.7 | 73.2  | 0.0002 | 0.0011 | 991   | 4951.1 | 67.9  |
| 10    | 0.0003 | 0.0014 | 990   | 4946.6 | 68.3  | 0.0003 | 0.0016 | 990   | 4944.3 | 63.0  |
| 15    | 0.0005 | 0.0024 | 989   | 4937.7 | 63.3  | 0.0006 | 0.0030 | 988   | 4933.8 | 58.1  |
| 20    | 0.0006 | 0.0032 | 986   | 4924.0 | 58.5  | 0.0011 | 0.0057 | 985   | 4912.3 | 53.3  |
| 25    | 0.0007 | 0.0035 | 983   | 4907.7 | 53.7  | 0.0014 | 0.0072 | 979   | 4880.1 | 48.6  |
| 30    | 0.0008 | 0.0040 | 980   | 4889.3 | 48.8  | 0.0016 | 0.0078 | 972   | 4843.9 | 43.9  |
| 35    | 0.0011 | 0.0054 | 976   | 4866.6 | 44.0  | 0.0023 | 0.0113 | 965   | 4798.3 | 39.2  |
| 40    | 0.0015 | 0.0075 | 971   | 4836.1 | 39.3  | 0.0032 | 0.0157 | 954   | 4734.2 | 34.6  |
| 45    | 0.0026 | 0.0129 | 963   | 4787.7 | 34.5  | 0.0053 | 0.0263 | 939   | 4636.4 | 30.2  |
| 50    | 0.0038 | 0.0189 | 951   | 4712.5 | 29.9  | 0.0079 | 0.0387 | 914   | 4488.1 | 25.9  |
| 55    | 0.0062 | 0.0306 | 933   | 4599.2 | 25.5  | 0.0108 | 0.0527 | 879   | 4286.0 | 21.8  |
| 60    | 0.0119 | 0.0579 | 904   | 4402.0 | 21.2  | 0.0204 | 0.0973 | 833   | 3971.0 | 17.9  |
| 65    | 0.0184 | 0.0883 | 852   | 4087.5 | 17.3  | 0.0300 | 0.1400 | 752   | 3507.5 | 14.5  |
| 70    | 0.0303 | 0.1416 | 777   | 3627.6 | 13.7  | 0.0491 | 0.2197 | 646   | 2891.2 | 11.5  |
| 75    | 0.0373 | 0.1715 | 667   | 3063.8 | 10.6  | 0.0612 | 0.2659 | 504   | 2192.4 | 9.0   |
| 80    | 0.0883 | 0.3632 | 553   | 2272.1 | 7.2   | 0.1177 | 0.4528 | 370   | 1424.4 | 6.3   |
| 85    | 0.2056 | 1.0000 | 352   | 1711.1 | 4.9   | 0.2216 | 1.0000 | 203   | 914.3  | 4.5   |

Note: Authors' calculations using data from the Kerala MARANAM Study and adjusted population estimates from the [DHS Program \(2020\)](#).

**Table A4** Life tables, 2013

| Age x | Female |        |       |        |       | Male   |        |       |        |       |
|-------|--------|--------|-------|--------|-------|--------|--------|-------|--------|-------|
|       | $nm_x$ | $nq_x$ | $l_x$ | $nL_x$ | $e_x$ | $nm_x$ | $nq_x$ | $l_x$ | $nL_x$ | $e_x$ |
| 0     | 0.0061 | 0.0060 | 1000  | 994.5  | 78.0  | 0.0071 | 0.0071 | 1000  | 993.4  | 70.8  |
| 1     | 0.0003 | 0.0014 | 994   | 3972.5 | 77.5  | 0.0004 | 0.0017 | 993   | 3967.7 | 70.3  |
| 5     | 0.0002 | 0.0010 | 993   | 4960.5 | 73.6  | 0.0002 | 0.0012 | 991   | 4953.1 | 66.5  |
| 10    | 0.0002 | 0.0012 | 992   | 4955.1 | 68.7  | 0.0003 | 0.0015 | 990   | 4946.2 | 61.5  |
| 15    | 0.0004 | 0.0022 | 990   | 4947.3 | 63.8  | 0.0007 | 0.0035 | 988   | 4934.6 | 56.6  |
| 20    | 0.0005 | 0.0025 | 988   | 4935.5 | 58.9  | 0.0013 | 0.0065 | 985   | 4909.8 | 51.8  |
| 25    | 0.0006 | 0.0031 | 986   | 4922.0 | 54.0  | 0.0016 | 0.0078 | 979   | 4874.4 | 47.1  |
| 30    | 0.0007 | 0.0034 | 983   | 4906.2 | 49.2  | 0.0018 | 0.0089 | 971   | 4834.7 | 42.5  |
| 35    | 0.0009 | 0.0047 | 980   | 4886.5 | 44.3  | 0.0026 | 0.0129 | 962   | 4782.8 | 37.8  |
| 40    | 0.0011 | 0.0057 | 975   | 4861.6 | 39.5  | 0.0038 | 0.0186 | 950   | 4708.4 | 33.3  |
| 45    | 0.0020 | 0.0100 | 969   | 4824.5 | 34.8  | 0.0061 | 0.0302 | 932   | 4595.9 | 28.9  |
| 50    | 0.0031 | 0.0155 | 960   | 4763.5 | 30.1  | 0.0092 | 0.0450 | 904   | 4425.7 | 24.7  |
| 55    | 0.0050 | 0.0246 | 945   | 4669.4 | 25.5  | 0.0122 | 0.0593 | 863   | 4197.8 | 20.7  |
| 60    | 0.0105 | 0.0512 | 921   | 4497.8 | 21.1  | 0.0239 | 0.1129 | 812   | 3844.6 | 16.9  |
| 65    | 0.0173 | 0.0831 | 874   | 4203.6 | 17.1  | 0.0349 | 0.1612 | 721   | 3325.5 | 13.7  |
| 70    | 0.0300 | 0.1403 | 802   | 3744.9 | 13.4  | 0.0541 | 0.2396 | 604   | 2674.9 | 10.8  |
| 75    | 0.0389 | 0.1780 | 689   | 3156.2 | 10.1  | 0.0655 | 0.2825 | 460   | 1981.0 | 8.4   |
| 80    | 0.0938 | 0.3819 | 566   | 2305.5 | 6.8   | 0.1261 | 0.4777 | 330   | 1249.2 | 5.7   |
| 85    | 0.2298 | 1.0000 | 350   | 1523.3 | 4.4   | 0.2732 | 1.0000 | 172   | 630.4  | 3.7   |

Note: Authors' calculations using data from the Kerala MARANAM Study and adjusted population estimates from the [DHS Program \(2020\)](#).

**Table A5** Life tables, 2014

| Age x | Female |        |       |        |       | Male   |        |       |        |       |
|-------|--------|--------|-------|--------|-------|--------|--------|-------|--------|-------|
|       | $nm_x$ | $nq_x$ | $l_x$ | $nL_x$ | $e_x$ | $nm_x$ | $nq_x$ | $l_x$ | $nL_x$ | $e_x$ |
| 0     | 0.0054 | 0.0054 | 1000  | 995.1  | 78.4  | 0.0066 | 0.0066 | 1000  | 993.9  | 71.4  |
| 1     | 0.0003 | 0.0012 | 995   | 3975.6 | 77.9  | 0.0004 | 0.0015 | 993   | 3970.2 | 70.8  |
| 5     | 0.0002 | 0.0009 | 993   | 4965.0 | 73.9  | 0.0002 | 0.0011 | 992   | 4956.9 | 66.9  |
| 10    | 0.0002 | 0.0011 | 993   | 4959.9 | 69.0  | 0.0003 | 0.0016 | 991   | 4950.3 | 62.0  |
| 15    | 0.0004 | 0.0020 | 991   | 4952.5 | 64.1  | 0.0007 | 0.0036 | 989   | 4938.4 | 57.1  |
| 20    | 0.0005 | 0.0025 | 989   | 4941.4 | 59.2  | 0.0013 | 0.0064 | 986   | 4913.9 | 52.3  |
| 25    | 0.0005 | 0.0026 | 987   | 4928.7 | 54.4  | 0.0015 | 0.0073 | 979   | 4879.8 | 47.6  |
| 30    | 0.0006 | 0.0031 | 984   | 4914.4 | 49.5  | 0.0017 | 0.0083 | 972   | 4842.0 | 42.9  |
| 35    | 0.0009 | 0.0042 | 981   | 4896.8 | 44.6  | 0.0025 | 0.0122 | 964   | 4792.8 | 38.3  |
| 40    | 0.0011 | 0.0055 | 977   | 4873.3 | 39.8  | 0.0035 | 0.0172 | 952   | 4723.9 | 33.7  |
| 45    | 0.0020 | 0.0098 | 972   | 4837.1 | 35.0  | 0.0057 | 0.0283 | 936   | 4619.3 | 29.3  |
| 50    | 0.0030 | 0.0148 | 962   | 4778.4 | 30.3  | 0.0089 | 0.0435 | 910   | 4454.8 | 25.0  |
| 55    | 0.0048 | 0.0238 | 948   | 4687.6 | 25.8  | 0.0113 | 0.0549 | 870   | 4238.6 | 21.1  |
| 60    | 0.0100 | 0.0490 | 926   | 4523.1 | 21.3  | 0.0234 | 0.1111 | 822   | 3897.1 | 17.1  |
| 65    | 0.0166 | 0.0798 | 880   | 4239.1 | 17.3  | 0.0336 | 0.1558 | 731   | 3383.5 | 13.9  |
| 70    | 0.0272 | 0.1276 | 810   | 3805.1 | 13.5  | 0.0511 | 0.2277 | 617   | 2748.2 | 11.0  |
| 75    | 0.0351 | 0.1620 | 707   | 3262.9 | 10.1  | 0.0608 | 0.2649 | 477   | 2076.5 | 8.5   |
| 80    | 0.0958 | 0.3879 | 592   | 2398.8 | 6.6   | 0.1226 | 0.4677 | 350   | 1336.4 | 5.7   |
| 85    | 0.2413 | 1.0000 | 362   | 1502.4 | 4.1   | 0.2886 | 1.0000 | 186   | 646.1  | 3.5   |

Note: Authors' calculations using data from the Kerala MARANAM Study and adjusted population estimates from the [DHS Program \(2020\)](#).

**Table A6** Life tables, 2015

| Age x | Female |        |       |        |       | Male   |        |       |        |       |
|-------|--------|--------|-------|--------|-------|--------|--------|-------|--------|-------|
|       | $nm_x$ | $nq_x$ | $l_x$ | $nL_x$ | $e_x$ | $nm_x$ | $nq_x$ | $l_x$ | $nL_x$ | $e_x$ |
| 0     | 0.0049 | 0.0049 | 1000  | 995.5  | 78.2  | 0.0059 | 0.0058 | 1000  | 994.6  | 71.6  |
| 1     | 0.0003 | 0.0013 | 995   | 3977.2 | 77.5  | 0.0004 | 0.0015 | 994   | 3973.1 | 71.0  |
| 5     | 0.0002 | 0.0008 | 994   | 4966.9 | 73.6  | 0.0002 | 0.0011 | 993   | 4960.6 | 67.1  |
| 10    | 0.0002 | 0.0011 | 993   | 4962.0 | 68.7  | 0.0003 | 0.0015 | 992   | 4954.2 | 62.2  |
| 15    | 0.0004 | 0.0022 | 992   | 4954.1 | 63.8  | 0.0007 | 0.0037 | 990   | 4942.1 | 57.3  |
| 20    | 0.0005 | 0.0025 | 990   | 4942.3 | 58.9  | 0.0011 | 0.0055 | 986   | 4919.4 | 52.5  |
| 25    | 0.0005 | 0.0026 | 987   | 4929.4 | 54.0  | 0.0014 | 0.0070 | 981   | 4888.1 | 47.8  |
| 30    | 0.0006 | 0.0031 | 985   | 4915.3 | 49.2  | 0.0017 | 0.0084 | 974   | 4850.9 | 43.1  |
| 35    | 0.0009 | 0.0044 | 981   | 4897.4 | 44.3  | 0.0024 | 0.0118 | 966   | 4802.7 | 38.4  |
| 40    | 0.0011 | 0.0056 | 977   | 4873.2 | 39.5  | 0.0033 | 0.0162 | 955   | 4736.9 | 33.9  |
| 45    | 0.0020 | 0.0101 | 972   | 4836.0 | 34.7  | 0.0054 | 0.0268 | 939   | 4637.7 | 29.4  |
| 50    | 0.0032 | 0.0157 | 962   | 4774.2 | 30.1  | 0.0084 | 0.0410 | 914   | 4481.0 | 25.1  |
| 55    | 0.0051 | 0.0252 | 947   | 4677.6 | 25.5  | 0.0113 | 0.0552 | 876   | 4268.6 | 21.1  |
| 60    | 0.0100 | 0.0490 | 923   | 4509.8 | 21.1  | 0.0229 | 0.1085 | 828   | 3931.1 | 17.2  |
| 65    | 0.0180 | 0.0863 | 878   | 4212.8 | 17.0  | 0.0357 | 0.1645 | 738   | 3402.4 | 13.9  |
| 70    | 0.0271 | 0.1272 | 802   | 3767.6 | 13.4  | 0.0492 | 0.2200 | 617   | 2757.4 | 11.1  |
| 75    | 0.0352 | 0.1627 | 700   | 3231.9 | 9.9   | 0.0588 | 0.2574 | 481   | 2104.6 | 8.6   |
| 80    | 0.0986 | 0.3975 | 586   | 2362.2 | 6.4   | 0.1235 | 0.4702 | 357   | 1360.6 | 5.6   |
| 85    | 0.2583 | 1.0000 | 353   | 1367.2 | 3.9   | 0.2909 | 1.0000 | 189   | 650.8  | 3.4   |

Note: Authors' calculations using data from the Kerala MARANAM Study and adjusted population estimates from the [DHS Program \(2020\)](#).

**Table A7** Life tables, 2016

| Age x | Female |        |       |        |       | Male   |        |       |        |       |
|-------|--------|--------|-------|--------|-------|--------|--------|-------|--------|-------|
|       | $nm_x$ | $nq_x$ | $l_x$ | $nL_x$ | $e_x$ | $nm_x$ | $nq_x$ | $l_x$ | $nL_x$ | $e_x$ |
| 0     | 0.0045 | 0.0045 | 1000  | 995.9  | 78.2  | 0.0053 | 0.0052 | 1000  | 995.1  | 71.7  |
| 1     | 0.0003 | 0.0013 | 995   | 3978.7 | 77.6  | 0.0004 | 0.0015 | 995   | 3975.5 | 71.1  |
| 5     | 0.0002 | 0.0009 | 994   | 4968.7 | 73.7  | 0.0002 | 0.0012 | 993   | 4963.5 | 67.2  |
| 10    | 0.0002 | 0.0010 | 993   | 4964.0 | 68.7  | 0.0003 | 0.0015 | 992   | 4956.8 | 62.3  |
| 15    | 0.0004 | 0.0019 | 992   | 4957.2 | 63.8  | 0.0008 | 0.0038 | 991   | 4944.3 | 57.4  |
| 20    | 0.0004 | 0.0022 | 990   | 4946.7 | 58.9  | 0.0012 | 0.0058 | 987   | 4920.6 | 52.6  |
| 25    | 0.0005 | 0.0027 | 988   | 4934.3 | 54.0  | 0.0014 | 0.0070 | 981   | 4888.6 | 47.9  |
| 30    | 0.0006 | 0.0029 | 985   | 4920.5 | 49.2  | 0.0016 | 0.0081 | 974   | 4852.3 | 43.2  |
| 35    | 0.0008 | 0.0041 | 983   | 4903.9 | 44.3  | 0.0023 | 0.0114 | 966   | 4805.9 | 38.5  |
| 40    | 0.0011 | 0.0054 | 979   | 4880.7 | 39.5  | 0.0031 | 0.0152 | 955   | 4743.0 | 33.9  |
| 45    | 0.0019 | 0.0094 | 973   | 4845.8 | 34.7  | 0.0053 | 0.0261 | 941   | 4648.0 | 29.4  |
| 50    | 0.0030 | 0.0148 | 964   | 4787.7 | 30.0  | 0.0080 | 0.0391 | 916   | 4496.3 | 25.1  |
| 55    | 0.0049 | 0.0240 | 950   | 4695.3 | 25.4  | 0.0108 | 0.0528 | 880   | 4292.1 | 21.0  |
| 60    | 0.0104 | 0.0509 | 927   | 4525.6 | 20.9  | 0.0224 | 0.1067 | 834   | 3963.7 | 17.1  |
| 65    | 0.0177 | 0.0848 | 880   | 4225.4 | 16.9  | 0.0361 | 0.1661 | 745   | 3431.0 | 13.8  |
| 70    | 0.0269 | 0.1263 | 805   | 3784.6 | 13.3  | 0.0499 | 0.2227 | 621   | 2771.8 | 11.0  |
| 75    | 0.0355 | 0.1638 | 704   | 3248.3 | 9.8   | 0.0597 | 0.2605 | 483   | 2108.0 | 8.4   |
| 80    | 0.1018 | 0.4081 | 588   | 2358.2 | 6.2   | 0.1281 | 0.4834 | 357   | 1347.6 | 5.5   |
| 85    | 0.2723 | 1.0000 | 348   | 1279.1 | 3.7   | 0.3068 | 1.0000 | 184   | 601.1  | 3.3   |

Note: Authors' calculations using data from the Kerala MARANAM Study and adjusted population estimates from the [DHS Program \(2020\)](#).

**Table A8** Life tables, 2017

| Age x | Female |        |       |        |       | Male   |        |       |        |       |
|-------|--------|--------|-------|--------|-------|--------|--------|-------|--------|-------|
|       | $nm_x$ | $nq_x$ | $l_x$ | $nL_x$ | $e_x$ | $nm_x$ | $nq_x$ | $l_x$ | $nL_x$ | $e_x$ |
| 0     | 0.0054 | 0.0054 | 1000  | 995.1  | 77.9  | 0.0062 | 0.0062 | 1000  | 994.3  | 71.4  |
| 1     | 0.0003 | 0.0013 | 995   | 3975.5 | 77.3  | 0.0004 | 0.0015 | 994   | 3971.8 | 70.9  |
| 5     | 0.0002 | 0.0011 | 993   | 4964.1 | 73.4  | 0.0002 | 0.0012 | 992   | 4958.9 | 67.0  |
| 10    | 0.0002 | 0.0011 | 992   | 4958.5 | 68.5  | 0.0003 | 0.0015 | 991   | 4952.1 | 62.1  |
| 15    | 0.0004 | 0.0022 | 991   | 4951.0 | 63.6  | 0.0008 | 0.0040 | 990   | 4939.0 | 57.2  |
| 20    | 0.0005 | 0.0025 | 989   | 4939.0 | 58.7  | 0.0011 | 0.0056 | 986   | 4915.2 | 52.4  |
| 25    | 0.0005 | 0.0024 | 986   | 4926.4 | 53.8  | 0.0013 | 0.0065 | 980   | 4884.8 | 47.7  |
| 30    | 0.0006 | 0.0030 | 984   | 4913.4 | 49.0  | 0.0016 | 0.0079 | 974   | 4850.3 | 43.0  |
| 35    | 0.0009 | 0.0043 | 981   | 4896.1 | 44.1  | 0.0023 | 0.0112 | 966   | 4805.2 | 38.3  |
| 40    | 0.0012 | 0.0058 | 977   | 4871.4 | 39.3  | 0.0032 | 0.0158 | 955   | 4741.8 | 33.7  |
| 45    | 0.0020 | 0.0099 | 971   | 4834.6 | 34.5  | 0.0051 | 0.0254 | 940   | 4647.1 | 29.2  |
| 50    | 0.0030 | 0.0150 | 962   | 4774.6 | 29.8  | 0.0078 | 0.0385 | 916   | 4498.1 | 24.9  |
| 55    | 0.0051 | 0.0250 | 947   | 4679.5 | 25.2  | 0.0111 | 0.0542 | 881   | 4292.2 | 20.8  |
| 60    | 0.0108 | 0.0525 | 924   | 4504.6 | 20.8  | 0.0230 | 0.1094 | 833   | 3957.4 | 16.8  |
| 65    | 0.0186 | 0.0889 | 875   | 4193.1 | 16.8  | 0.0377 | 0.1731 | 742   | 3406.6 | 13.5  |
| 70    | 0.0278 | 0.1303 | 797   | 3739.1 | 13.2  | 0.0533 | 0.2362 | 614   | 2717.4 | 10.8  |
| 75    | 0.0353 | 0.1630 | 693   | 3203.7 | 9.8   | 0.0596 | 0.2601 | 469   | 2046.4 | 8.4   |
| 80    | 0.1030 | 0.4122 | 580   | 2322.3 | 6.2   | 0.1316 | 0.4933 | 347   | 1300.2 | 5.4   |
| 85    | 0.2724 | 1.0000 | 341   | 1252.1 | 3.7   | 0.3090 | 1.0000 | 176   | 568.6  | 3.2   |

Note: Authors' calculations using data from the Kerala MARANAM Study and adjusted population estimates from the [DHS Program \(2020\)](#).



**Table A9** Crude death rate estimates adjusted for migration (2011); by sex

|                                            | Female | Male | Total |
|--------------------------------------------|--------|------|-------|
| Crude death rate (CDR) <sup>a</sup>        | 5.93   | 8.64 | 7.23  |
| CDR excluding migrants <sup>b</sup>        | 5.99   | 8.70 | 7.29  |
| CDR excluding recent migrants <sup>c</sup> | 5.89   | 8.54 | 7.16  |

<sup>a</sup> Census populations, all civil registration system deaths.

<sup>b</sup> Deaths are for people with permanent residence in Kerala, and population counts exclude people born outside Kerala.

<sup>c</sup> Deaths are for people with permanent residence in Kerala, and population counts exclude people whose last residence was outside Kerala in the last year.

**Table A10** Standard deviation, mortality rate ( ${}_n m_x$ ), 2006–2017

| Age x | CRS    |       | SRS    |       |
|-------|--------|-------|--------|-------|
|       | Female | Male  | Female | Male  |
| 0     | 1.38   | 1.88  | 1.13   | 1.09  |
| 1     | 0.08   | 0.08  | 0.21   | 0.19  |
| 5     | 0.04   | 0.04  | 0.09   | 0.11  |
| 10    | 0.03   | 0.02  | 0.11   | 0.12  |
| 15    | 0.04   | 0.07  | 0.18   | 0.27  |
| 20    | 0.08   | 0.06  | 0.28   | 0.32  |
| 25    | 0.07   | 0.08  | 0.30   | 0.43  |
| 30    | 0.07   | 0.07  | 0.26   | 0.45  |
| 35    | 0.09   | 0.17  | 0.25   | 0.42  |
| 40    | 0.12   | 0.29  | 0.50   | 0.77  |
| 45    | 0.18   | 0.40  | 0.55   | 0.88  |
| 50    | 0.24   | 0.51  | 1.19   | 0.96  |
| 55    | 0.40   | 0.82  | 0.79   | 1.20  |
| 60    | 0.98   | 1.76  | 1.44   | 1.81  |
| 65    | 0.80   | 2.15  | 1.73   | 2.63  |
| 70    | 1.59   | 3.45  | 4.91   | 6.66  |
| 75    | 1.61   | 2.97  | 8.81   | 6.50  |
| 80    | 7.64   | 8.10  | 11.68  | 13.54 |
| 85    | 31.51  | 31.92 | 29.63  | 36.72 |

Note: Authors' calculations using data from the Kerala MARANAM Study and adjusted population estimates from the [DHS Program \(2020\)](#). CRS: Civil Registration System. SRS: Sample Registration System.
